# Supplementary material for: Insecticide Resistance Monitoring in Field Populations of the Whitebacked Planthopper Sogatella furcifera (Horvath) in China, 2019–2020
Source: MDPI journal article supplement (doi:10.3390/insects12121078), 2021-11-30
Supplement: s1 [file s1]

Table S1 Concentrations of immersion for each insecticide

| <b>Insecticide</b> | <b>Concentration- 2019 (mg/L)</b> | <b>Concentration- 2020 (mg/L)</b> |
|--------------------|-----------------------------------|-----------------------------------|
| Imidacloprid       | 0/0.4/0.8/1.6/3.2/6.4             | 0/0.4/0.8/1.6/3.2/6.4             |
| Thiamethoxam       | 0/0.2/0.4/0.8/1.6/3.2             | 0/0.2/0.4/0.8/1.6/3.2             |
| Nitenpyram         | 0/0.1/0.4/0.8/1.6/3.2             | 0/0.4/0.8/1.6/3.2/6.4             |
| Dinotefuran        | 0/1/2/4/8/16                      | 0/1/2/4/8/16                      |
| Clothianidin       | 0/0.2/0.4/0.8/1.6/3.2             | 0/0.4/0.8/1.6/3.2/6.4             |
| Sulfoxaflor        | 0/1/2/4/8/16                      | 0/1/2/4/8/16                      |
| Buprofezin         | 0/1/2/4/8/16                      | 0/1/2/4/8/16                      |
| Isoprocarb         | 0/100/200/400/800/1200            | 0/20/40/80/160/320                |
| Ethofenprox        | 0/100/200/400/800/1200            | 0/50/100/200/400/800              |
| Chlorpyrifos       | 0/10/20/40/80/160                 | 0/4/8/16/32/64                    |
